# Supplementary material for: Extracellular Vesicles Derived from Hypoxic Human Mesenchymal Stem Cells Attenuate GSK3β Expression via miRNA-26a in an Ischemia-Reperfusion Injury Model
Source: PubMed Central journal article supplement — Yonsei Med J. 2018 Jul 4;59(6):736–45. doi: 10.3349/ymj.2018.59.6.736 (PMC6037597; doi:10.3349/ymj.2018.59.6.736), 2018-07-04
Supplement: ymj-59-736-s003.pdf [file ymj-59-736-s003.pdf]

WNT SIGNALING PATHWAY

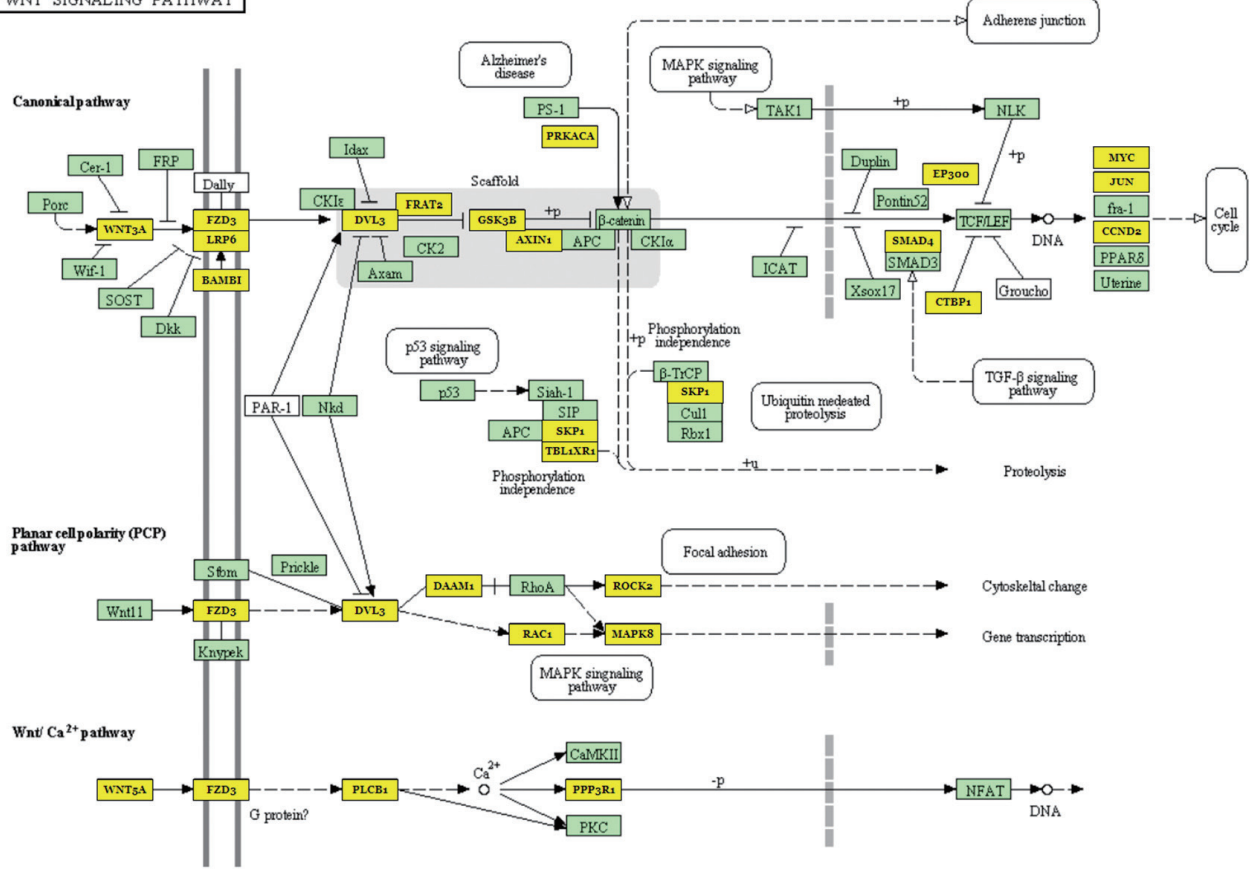

Supplementary Fig. 2. Mapping of Wnt pathways mediated by miR-26a. In this map, these yellow target genes could be regulated by miR-26a.
